# Supplementary material
Source: MDPI journal article supplement (https://www.mdpi.com/2071-1050/15/17/12899)
Supplement: s1 [file s1]

# A functional end-use of hemp seeds waste: technological, qualitative, nutritional and sensorial characterization of fortified bread

Fabiola Sciacca<sup>1</sup>, Nino Virzi<sup>1</sup>, Nicola Pecchioni<sup>1</sup>, Maria Grazia Melilli<sup>2\*</sup>, Carla Buzzanca<sup>3</sup>, Sonia Bonacci<sup>4</sup> and Vita Di Stefano<sup>3</sup>

<sup>1</sup> CREA - Council for Agricultural Research and Economics - Research Centre for Cereal and Industrial Crops of Acireale (Catania, Italy); fabiola.sciacca@crea.gov.it; nicola.pecchioni@crea.gov.it (N.P.); nino.virzi@crea.gov.it (N.V.).

<sup>2</sup> National Council of Research, Institute of BioEconomy (CNR-IBE), (Catania, Italy) mariagrazia.melilli@cnr.it (M.G.M).

<sup>3</sup> Department of Biological, Chemical and Pharmaceutical Sciences and Technologies, University of Palermo, Italy; vita.distefano@unipa.it (V.D.S.); carla.buzzanca@unipa.it (C.B.)

<sup>4</sup> Department of Health Sciences, University Magna Græcia of Catanzaro, Germaneto, (Catanzaro, Italy); s.bonacci@unicz.it (S.B.)

\*Correspondence: mariagrazia.melilli@cnr.it (M.G.M); Tel.: +39 3485684510

**Abstract:** The edible portion of *Cannabis sativa* L. are the seeds.

The seeds are generally used for the production of hemp oil, appreciated for the high percentage of  $\alpha$ -linolenic acid. The waste obtained after seeds oil extraction, reduced in fine powder, is the subject of this study.

Since hemp seeds are considered to be a source of many valuable bioactive compounds, the addition of hemp seed flour to durum wheat for making fortified bread could have an effect on the health of consumers.

The aim of this study was to use variable percentages of hemp seed flour for the production of bread, and to determine the fortification impact on chemicals, texture, organoleptic characteristics, crumb color, changes in crumb texture, total polyphenols, free radical scavenging activity and amino acids contents.

The rheological and chemical qualities of bread samples, obtained by using a durum wheat cultivar Ciclope fortified with defatted hemp seeds flours, were evaluated. The solid residue left after the extraction of the oil from seeds (generally thrown away as waste or added to feed) was shredded and sieved at 0.530 mm (Hemp 1) or 0.236 mm (Hemp 2). Samples of fortified breads were obtained by substitution of variable percentages of durum wheat flour with the two hemp flours (5%, 7.5%, and 10%).

Fortified bread's total phenolic content was in a range of  $0.73 \pm 0.017$  and  $1.73 \pm 0.029$  mg GAE/g and anti-radical scavenging activity was included in the range from  $1.17 \pm 0.099$  and  $3.18 \pm 0.071$  mmol TEAC/100g, according to the increasing fortification.

Comparison between bread made with Ciclope semolina and hemp flour fortified breads, showed a large increase in amino acid content in fortified samples ones. In particular, bread fortified with 10% Hemp 2 flour highlights a greater content of glutamic acid, tyrosine, proline and essential amino acids such as leucine and isoleucine, compared to the other samples with same percentage of substitution.

The amount of hemp seed flour influenced the color of the crumb by increasing the yellow index from 18.24 (100% Ciclope) to 21.33 (bread with Hemp 2 flour at 5%).

**Table S1:** Retention time (min.), coefficient of determination (R<sup>2</sup>) and linear regression model of external standards used for amino acids quantification

| <i>Aminoacid</i> | <i>(RT min)</i> | <i>R<sup>2</sup></i> | <i>Linear Regression</i> |
|------------------|-----------------|----------------------|--------------------------|
| L-Arginine       | 34.57           | 0.936                | y=5080x-12.886           |
| L-Serine         | 41.22           | 0.940                | y=1E+03x-5.1252          |
| L-Glutamine      | 42.20           | 0.951                | y=4688x+40.672           |
| L-Threonine      | 44.16           | 0.955                | y=1E+03x-1.7525          |
| L-Tyrosine       | 47.28           | 0.948                | y=1430x+0.1383           |
| L-Alanine        | 47.55           | 0.958                | y=3542x-9.8959           |
| L-Leucine        | 48.97           | 0.976                | y=4316x+21.998           |
| L-Methionine     | 51.13           | 0.961                | y=8249x-2.4881           |
| L-Valine         | 51.46           | 0.934                | y=4547x+0.1747           |
| L-Phenylalanine  | 52.51           | 0.952                | y=3433x-6.8667           |
| L-Isoleucine     | 52.64           | 0.935                | y=2E+03x+21.421          |
| L-Lysine         | 55.24           | 0.988                | y=700x+13.888            |
| L-Histidine      | 55.45           | 0.960                | y=2838x+5.6484           |
| L-Proline        | 56.80           | 0.939                | y=901x-3.7975            |

**Table S2:** Chemical characterization of raw materials

| Flour                               | Ciclope      | Hemp 1        | Hemp 2        |
|-------------------------------------|--------------|---------------|---------------|
| TPC mgGAE/g                         | 2.45 ± 0.001 | 6.38 ± 0.002  | 6.35 ± 0.001  |
| DPPH <sub>TEAC</sub> mmol TE /100g  | 1.35± 0.0355 | 3.94 ± 0.0178 | 3.75 ± 0.0179 |
| % Scavenging                        | 29.7         | 53.2          | 51.5          |
| Fatty acid (Relative percentages %) |              |               |               |
| Palmitic acid                       | 17.6±0.30    | 9.04±0.17     | 9.10±0.057    |
| Stearic acid                        | 1.54±0.16    | 3.42±0.025    | 3.32±0.060    |
| Oleic acid                          | 17.3±0.51    | 14.6±0.062    | 14.5±0.081    |
| Linoleic acid                       | 59.9±0.89    | 53.7±0.35     | 53.7±0.17     |
| γ linolenic acid                    | -            | 2.44±0.075    | 2.47±0.089    |
| α linolenic acid                    | 3.62±0.53    | 15.7±0.21     | 15.5±0.050    |
| ω-6                                 | 59.95        | 56.12         | 56.13         |
| ω-3                                 | 3.62         | 15.66         | 15.54         |
| Amino acids (g/100 g)               |              |               |               |
| Arginine                            | 0.34         | 0.52          | 0.58          |
| Serine                              | 1.59         | 2.00          | 1.89          |
| Glutamine                           | 2.90         | 4.96 b        | 5.38 a        |
| Tyrosine                            | 3.37         | 3.43          | 3.19          |
| Alanine                             | 0.85         | 1.37          | 1.84          |
| Histidine                           | 0.53         | 0.92          | 0.94          |
| Proline                             | 1.23         | 3.22          | 2.99          |
| Threonine                           | 1.80         | 1.97 b        | 2.51 a        |
| Leucine                             | 1.78         | 2.75          | 2.97          |
| Methionine                          | 0.14         | 0.61          | 0.83          |
| Valine                              | 0.58         | 1.17 b        | 2.00 a        |
| Phenilalanine                       | 0.25         | 0.40          | 0.45          |
| Isoleucine                          | 3.52         | 6.94          | 6.21          |
| Lysine                              | 0.16         | 2.07 b        | 2.58 a        |
| Σ AA                                | 19.0         | 32.3 b        | 34.36 a       |
| Σ essential AA                      | 8.23         | 15.9 b        | 17.6 a        |

Data are expressed as mean±SD of triplicate experiments.

Different letters indicated differences at P<0.05 between Hemp -1 and Hemp 2 flour samples. Values without letters are not statistically different
